# Supplementary material for: The effectiveness of different down-regulating protocols on in vitro fertilization-embryo transfer in endometriosis: a meta-analysis
Source: Springer Nature journal article supplement (doi:10.1186/s12958-020-00571-6), 2020-02-29
Supplement: MOESM1 [file 17757086]

**Additional file 1: Table S1** Characteristics of the included studies.

| Study         | Ultra-long protocol               | Long protocol           | Short protocol     | Outcome indicators |
|---------------|-----------------------------------|-------------------------|--------------------|--------------------|
| Maged [11]    | Decapetyl 3.75mg, 3 cycles        | Decapetyl 0.1mg         |                    | ②③④⑦               |
| Decler [12]   | Goserelin 3.6 mg, 3 cycles        | Buserelin 900μg         |                    | ②③④⑦               |
| Rickes [13]   | Goserelin 3.6mg, 5-6 cycles       | Decapetyl 0.1mg         |                    | ⑦                  |
| Surrey [14]   | Leuprorelin 3.75mg, 3 cycles      | Leuprorelin 0.5~1.0mg   |                    | ①②③④⑤⑥⑦            |
| Jiang HL [15] | 3.75mg, 3 cycles, Unknown drug    | Unknown 0.1mg           |                    | ①⑦                 |
| Dai L [16]    | 3.75mg, 3 cycles, Unknown drug    | Triptorelin 0.1mg       |                    | ①⑤⑥⑦               |
| Lin WQ [17]   | Goserelin 3.6mg, 3 cycles         | Decapetyl 0.1mg         |                    | ①⑤⑦                |
| Sõritsa [18]  | Diphereline 3.75mg, 3 cycles      | No mention              |                    | ⑤                  |
| Tamura [19]   | Buserelin 1.8 mg, 3 cycles        | Buserelin 900μg         |                    | ①③④⑤⑥⑦             |
| Ma [20]       | Diphereline 3.75mg, 3 cycles      | Diphereline 0.05~0.1mg  |                    | ①③④⑤⑦              |
| Nakamura [21] | Buserelin 900μg~1200μg, 3 cycles  | Buserelin 900μg         |                    | ③④⑤⑦               |
| Wang F [22]   | Leuprorelin 3.75mg, 2 cycles      | Decapetyl 0.1mg         |                    | ①②③④⑤⑥⑦            |
| Du H [23]     | Diphereline 3.75mg, 3 cycles      | Diphereline 1.25mg      | Diphereline 0.1mg  | ①②③④⑤⑥⑦            |
| Jiang YH [24] | Leuprorelin 3.75mg                | Triptorelin 0.1mg       | Triptorelin 0.1mg  | ②③④⑤⑥⑦             |
| Zhang QF [25] | Diphereline 1.25~1.88mg, 2 cycles | Diphereline 1.25~1.88mg | Diphereline 0.05mg | ①②③④⑥⑦             |
| Song N [26]   | Diphereline 3.75mg, 2-3 cycles    | Diphereline 0.1mg       |                    | ①②③④⑤⑦             |
| Deng HL [27]  | Diphereline 3.75mg, 3 cycles      | Triptorelin 0.1mg       |                    | ①②③④⑤⑥⑦            |
| Sun YL [28]   | Decapetyl 3.75mg, 2-3 cycles      | Decapetyl 1.90mg        | Decapetyl 1.33 mg  | ②③④⑤⑦              |
| Niu HY [29]   | Diphereline 3.75mg, 2-3 cycles    | Triptorelin 0.1mg       |                    | ①③⑤⑥⑦              |
| Cheng D [30]  | Decapetyl 3.75mg, 2-3 cycles      | Triptorelin 0.1mg       | Triptorelin 0.1mg  | ①②③④⑤⑥⑦            |
| Wang L [31]   | Decapetyl 3.75mg, 3 cycles        | Decapetyl 3.75mg        |                    | ①⑤⑥⑦               |

①implantation rate; ②basal FSH level; ③dose of gonadotropin; ④duration of ovarian stimulation(days); ⑤the number of retrieved oocytes; ⑥fertilization rate; ⑦clinical pregnancy rate. One cycle was equivalent to 28 days.
