# Supplementary material for: The effectiveness of different down-regulating protocols on in vitro fertilization-embryo transfer in endometriosis: a meta-analysis
Source: Springer Nature journal article supplement (doi:10.1186/s12958-020-00571-6), 2020-02-29
Supplement: MOESM2 [file 17757086]

**Additional file 2: Table S2** Risk of bias of included RCTs using the Cochrane risk assessment tool.

| Included studies<br>First author /Year | Random<br>sequence<br>generation | Allocation<br>concealment | Blind method                                 |                                      | Incomplete<br>outcome<br>data | Selective<br>reporting | Other bias |
|----------------------------------------|----------------------------------|---------------------------|----------------------------------------------|--------------------------------------|-------------------------------|------------------------|------------|
|                                        |                                  |                           | Blinding of<br>participants<br>and personnel | Blinding of<br>outcome<br>assessment |                               |                        |            |
| Maged 2018[11]                         | Low risk                         | Low risk                  | Low risk                                     | Low risk                             | Low risk                      | Low risk               | High risk  |
| Decler 2016[12]                        | Low risk                         | Low risk                  | Low risk                                     | Low risk                             | Low risk                      | Low risk               | High risk  |
| Rickes 2002[13]                        | Low risk                         | Low risk                  | Low risk                                     | Low risk                             | Low risk                      | Low risk               | High risk  |
| Surrey 2002[14]                        | Low risk                         | Unclear risk              | Low risk                                     | Low risk                             | Low risk                      | Low risk               | High risk  |
| Jiang HL2018[15]                       | Unclear risk                     | Unclear risk              | Low risk                                     | Low risk                             | Low risk                      | Low risk               | High risk  |
| Dai L 2017[16]                         | Unclear risk                     | Unclear risk              | Low risk                                     | Low risk                             | Low risk                      | Low risk               | High risk  |
| Lin WQ 2004[17]                        | High risk                        | Unclear risk              | Low risk                                     | Low risk                             | Low risk                      | Low risk               | High risk  |
