# Supplementary material for: The effectiveness of different down-regulating protocols on in vitro fertilization-embryo transfer in endometriosis: a meta-analysis
Source: Springer Nature journal article supplement (doi:10.1186/s12958-020-00571-6), 2020-02-29
Supplement: MOESM3 [file 17757086]

**Additional file 3: Table S3** Quality assessment of included cohort studies using the Newcastle–Ottawa Scale.

| Included studies<br>First author /Year | Subject selection                              |                                           |                              | Comparability<br>Control of<br>confounding<br>factors | Outcome                                                                           |                          |                              | Score |                                     |
|----------------------------------------|------------------------------------------------|-------------------------------------------|------------------------------|-------------------------------------------------------|-----------------------------------------------------------------------------------|--------------------------|------------------------------|-------|-------------------------------------|
|                                        | Representativeness<br>of the exposed<br>cohort | Selection of the<br>non-exposed<br>cohort | Ascertainment<br>of exposure |                                                       | Demonstration that<br>outcome of interest<br>was not present at<br>start of study | Assessment<br>of outcome | Was follow-up<br>long enough |       | Adequacy of follow<br>up of cohorts |
| Sõritsa 2015[18]                       | 1                                              | 1                                         | 1                            |                                                       | 1                                                                                 | 1                        | 1                            | 1     | 7                                   |
| Tamura 2014[19]                        | 1                                              | 1                                         | 1                            |                                                       | 1                                                                                 | 1                        | 1                            | 1     | 7                                   |
| Ma 2008[20]                            | 1                                              | 1                                         | 1                            | 1                                                     | 1                                                                                 | 1                        | 1                            | 1     | 8                                   |
| Nakamura 1992[21]                      | 1                                              | 1                                         | 1                            |                                                       | 1                                                                                 | 1                        | 1                            | 1     | 7                                   |
| Wang F 2017[22]                        | 1                                              | 1                                         | 1                            |                                                       | 1                                                                                 | 1                        | 1                            | 1     | 7                                   |
| Du H 2017[23]                          | 1                                              | 1                                         | 1                            |                                                       | 1                                                                                 | 1                        | 1                            | 1     | 7                                   |
| Jiang YH 2016[24]                      | 1                                              | 1                                         | 1                            |                                                       | 1                                                                                 | 1                        | 1                            | 1     | 7                                   |
| Zhang QF 2015[25]                      | 1                                              | 1                                         | 1                            |                                                       | 1                                                                                 | 1                        | 1                            | 1     | 7                                   |
| Song N 2014[26]                        | 1                                              | 1                                         | 1                            |                                                       | 1                                                                                 | 1                        | 1                            | 1     | 7                                   |
| Deng HL 2012[27]                       | 1                                              | 1                                         | 1                            |                                                       | 1                                                                                 | 1                        | 1                            | 1     | 7                                   |
| Sun YL 2012[28]                        | 1                                              | 1                                         | 1                            |                                                       | 1                                                                                 | 1                        | 1                            | 1     | 7                                   |
| Niu HY 2011[29]                        | 1                                              | 1                                         | 1                            |                                                       | 1                                                                                 | 1                        | 1                            | 1     | 7                                   |
| Cheng D 2010[30]                       | 1                                              | 1                                         | 1                            |                                                       | 1                                                                                 | 1                        | 1                            | 1     | 7                                   |
| Wang L 2009[31]                        | 1                                              | 1                                         | 1                            |                                                       | 1                                                                                 | 1                        | 1                            | 1     | 7                                   |
