# Supplementary material for: The effectiveness of different down-regulating protocols on in vitro fertilization-embryo transfer in endometriosis: a meta-analysis
Source: Springer Nature journal article supplement (doi:10.1186/s12958-020-00571-6), 2020-02-29
Supplement: MOESM4 [file 17757086]

**Additional file 4: Table S4** Basic characteristics of the included studies.

| Included studies   |            | Age        | BMI                  | AFC        | Basal E2       | Basal LH      | CA125 before              | CA125 after               | Medical treatments before IVF cycle                        |
|--------------------|------------|------------|----------------------|------------|----------------|---------------|---------------------------|---------------------------|------------------------------------------------------------|
| First author /Year | Protocol   | (years)    | (kg/m <sup>2</sup> ) | (n)        | Levels (pg/ml) | levels (IU/L) | down-regulation<br>(KU/L) | down-regulation<br>(KU/L) |                                                            |
| Maged 2018[11]     | Ultra-long | 31.20±1.40 |                      |            | 53.10±3.70     | 6.20±0.90     |                           |                           | Without hormone therapy for 1 years                        |
|                    | Long       | 30.80±1.20 |                      |            | 51.90±3.50     | 5.90±0.80     |                           |                           |                                                            |
| Decleer 2016[12]   | Ultra-long | 30.30±3.63 | 23.40±4.20           |            |                |               |                           |                           | Surgical treatment                                         |
|                    | Long       | 31.70±4.28 | 23.10±4.58           |            |                |               |                           |                           |                                                            |
| Rickes 2002[13]    | Ultra-long |            |                      |            |                |               |                           |                           | Surgical treatment                                         |
|                    | Long       |            |                      |            |                |               |                           |                           |                                                            |
| Surrey 2002[14]    | Ultra-long | 33.12±0.67 |                      |            | 30.26±5.37     |               |                           |                           | Surgical treatment                                         |
|                    | Long       | 32.58±0.56 |                      |            | 30.23±4.84     |               |                           |                           |                                                            |
| Jiang HL 2018[15]  | Ultra-long | 30.95±5.37 |                      |            |                |               |                           |                           | No mentioned                                               |
|                    | Long       | 31.74±5.28 |                      |            |                |               |                           |                           |                                                            |
| Dai L 2017[16]     | Ultra-long |            |                      |            |                |               |                           |                           | No mentioned                                               |
|                    | Long       |            |                      |            |                |               |                           |                           |                                                            |
| Lin WQ 2004[17]    | Ultra-long | 31.00±4.00 |                      |            |                |               |                           |                           | Without hormone therapy for 3 months                       |
|                    | Long       | 32.00±3.00 |                      |            |                |               |                           |                           |                                                            |
| Sõritsa 2015[18]   | Ultra-long | 33.30±4.70 |                      |            |                |               |                           |                           | No mentioned                                               |
|                    | Long       | 33.00±3.90 |                      |            |                |               |                           |                           |                                                            |
| Tamura 2014[19]    | Ultra-long | 33.50±3.30 |                      |            |                |               |                           |                           | Without hormone therapy                                    |
|                    | Long       | 34.50±3.40 |                      |            |                |               |                           |                           |                                                            |
| Ma 2008[20]        | Ultra-long | 32.91±3.41 |                      |            |                |               |                           |                           | No mentioned                                               |
|                    | Long       | 32.91±3.02 |                      |            |                |               |                           |                           |                                                            |
| Nakamura 1992[21]  | Ultra-long | 31.40±3.20 |                      |            |                |               |                           |                           | No mentioned                                               |
|                    | Long       | 33.60±2.60 |                      |            |                |               |                           |                           |                                                            |
| Wang F 2017[22]    | Ultra-long | 30.67±4.52 | 21.89±2.80           | 10.92±2.73 | 40.11±3.86     |               | 39.59±12.16               | 35.57±10.17               | No mentioned                                               |
|                    | Long       | 31.27±2.52 | 22.45±1.73           | 9.56±2.85  | 42.23±2.76     |               | 31.03±20.14               | 31.93±17.29               |                                                            |
| Du H 2017[23]      | Ultra-long | 32.69±3.62 | 21.93±1.60           | 4.98±1.95  | 40.57±19.58    | 5.74±8.41     |                           |                           | Without hormone therapy and immunosuppressant for 3 months |
|                    | Long       | 31.54±2.11 | 21.51±1.59           | 5.16±1.48  | 50.69±35.29    | 3.23±0.97     |                           |                           |                                                            |
|                    | Short      | 33.45±2.79 | 22.48±1.32           | 5.38±1.22  | 53.34±29.85    | 4.42±1.71     |                           |                           |                                                            |

**Continued.**

|                   |            |            |            |             |           |             |            |                                                            |
|-------------------|------------|------------|------------|-------------|-----------|-------------|------------|------------------------------------------------------------|
| Jiang YH 2016[24] | Ultra-long | 30.63±3.60 | 22.59±3.16 | 39.48±12.07 |           |             |            | No mentioned                                               |
|                   | Long       | 30.24±4.09 | 22.57±3.11 | 38.95±12.87 |           |             |            |                                                            |
|                   | Short      | 31.61±3.41 | 22.47±2.25 | 38.90±11.47 |           |             |            |                                                            |
| Zhang QF 2015[25] | Ultra-long | 30.37±3.53 | 20.25±2.14 | 56.33±4.52  | 4.71±2.53 |             |            | Without hormone therapy and immunosuppressant for 6 months |
|                   | Long       | 31.44±4.36 | 21.39±5.75 | 53.74±38.16 | 5.51±2.00 |             |            |                                                            |
|                   | Short      | 30.36±3.37 | 21.98±4.56 | 54.41±35.68 | 4.80±2.23 |             |            |                                                            |
| Song N 2014[26]   | Ultra-long | 33.60±4.50 |            | 48.70±38.30 | 5.28±5.90 |             |            | No mentioned                                               |
|                   | Long       | 32.90±4.10 |            | 63.50±28.80 | 4.38±1.90 |             |            |                                                            |
| Deng HL 2012[27]  | Ultra-long | 30.84±2.67 | 21.24±1.86 | 33.00±14.61 | 3.86±2.81 | 53.25±41.57 | 15.89±7.18 | No mentioned                                               |
|                   | Long       | 30.49±3.11 | 21.06±2.09 | 31.73±14.98 | 3.32±1.19 | 21.43±12.74 | 18.75±8.21 |                                                            |
| Sun YL 2012[28]   | Ultra-long | 31.37±3.44 | 8.27±2.75  | 57.18±31.58 | 4.77±2.52 |             |            | No mentioned                                               |
|                   | Long       | 31.82±3.04 | 10.34±2.61 | 56.53±29.98 | 4.54±2.12 |             |            |                                                            |
|                   | Short      | 33.14±3.92 | 4.30±1.73  | 48.52±30.53 | 4.93±3.12 |             |            |                                                            |
| Niu HY 2011[29]   | Ultra-long | 31.50±2.50 | 10.20±3.10 | 45.20±8.70  |           |             |            | No mentioned                                               |
|                   | Long       | 32.10±2.70 | 10.50±3.40 | 46.10±7.90  |           |             |            |                                                            |
| Cheng D 2010[30]  | Ultra-long | 31.70±4.10 | 10.30±4.50 | 49.80±12.60 |           |             |            | No mentioned                                               |
|                   | Long       | 31.30±3.50 | 10.70±5.10 | 56.80±14.80 |           |             |            |                                                            |
|                   | Short      | 33.10±3.10 | 9.90±4.30  | 54.30±13.30 |           |             |            |                                                            |
| Wang L 2009[31]   | Ultra-long | 32.10±3.10 |            |             |           |             |            | No mentioned                                               |
|                   | Long       | 31.70±2.30 |            |             |           |             |            |                                                            |

AFC: Antral follicle count.
