# Supplementary material for: The effectiveness of different down-regulating protocols on in vitro fertilization-embryo transfer in endometriosis: a meta-analysis
Source: Springer Nature journal article supplement (doi:10.1186/s12958-020-00571-6), 2020-02-29
Supplement: MOESM7 [file 17757086]

**A**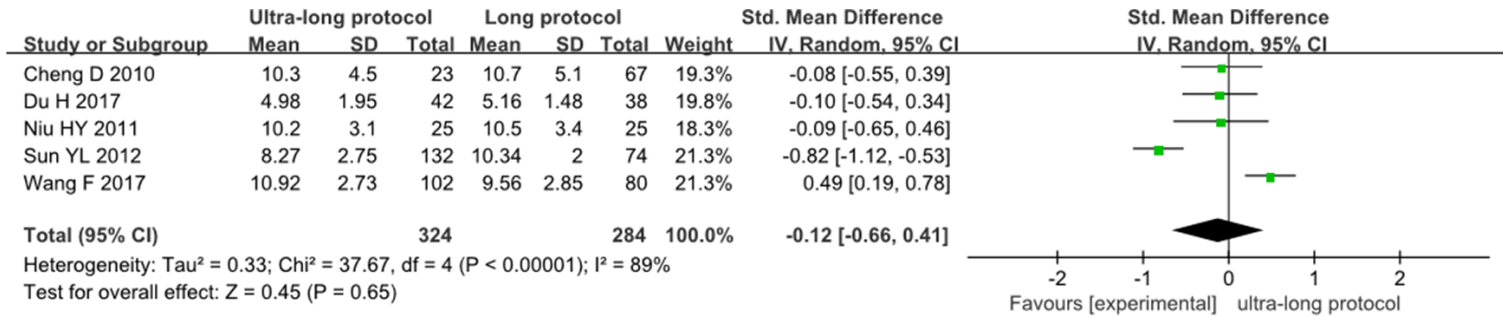**B**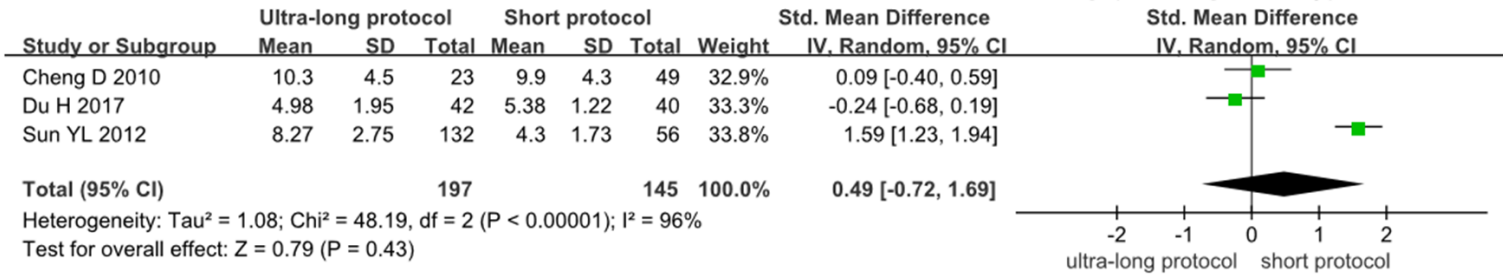

**Fig. S3** Meta-analysis on antral follicle count in non-RCTs: the ultra-long protocol versus long protocol (A), and the ultra-long protocol versus short protocol (B).
