# Supplementary material for: The effectiveness of different down-regulating protocols on in vitro fertilization-embryo transfer in endometriosis: a meta-analysis
Source: Springer Nature journal article supplement (doi:10.1186/s12958-020-00571-6), 2020-02-29
Supplement: MOESM10 [file 17757086]

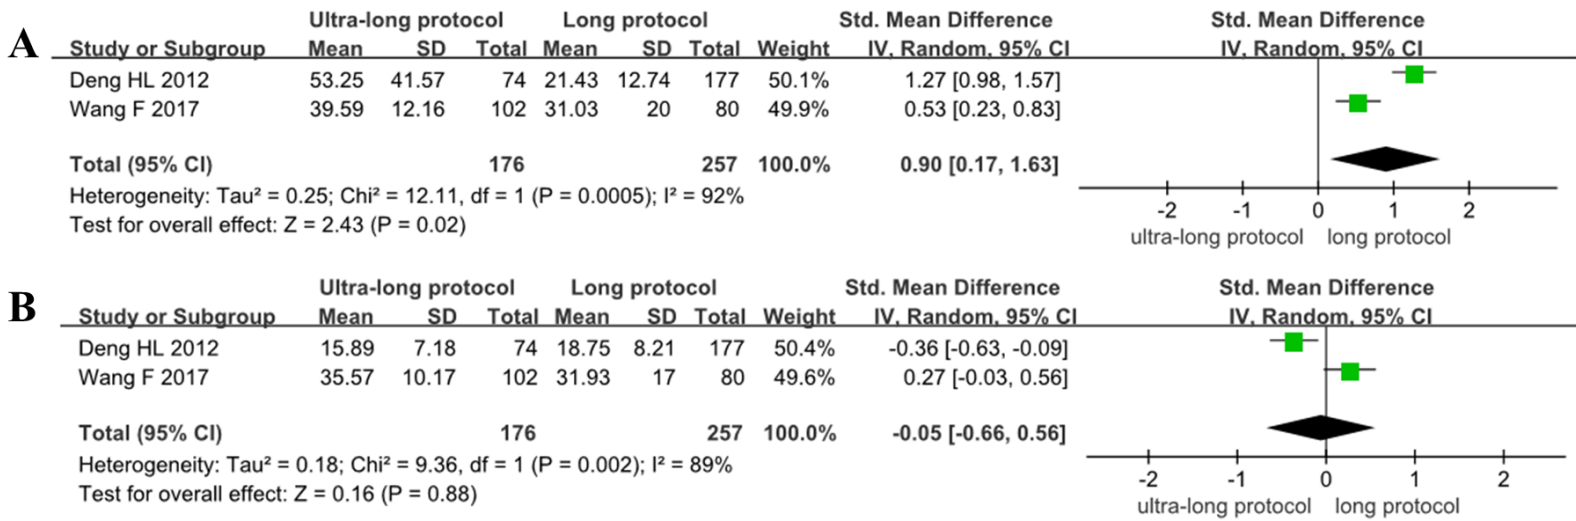

**Fig. S6** Meta-analysis on CA125 in non-RCTs: the ultra-long protocol versus long protocol before down-regulation (A), and after down-regulation (B).
