# Supplementary material for: The effectiveness of different down-regulating protocols on in vitro fertilization-embryo transfer in endometriosis: a meta-analysis
Source: Reprod Biol Endocrinol. 2020 Feb 29;18:16. doi: 10.1186/s12958-020-00571-6 (PMC7049222; doi:10.1186/s12958-020-00571-6)
Supplement: Supplementary file 6 — Additional file 6: Figure S2. Meta-analysis on BMI in non-RCTs: the ultra-long protocol versus long protocol (A), and the ultra-long protocol versus short protocol (B). [file 12958_2020_571_MOESM6_ESM.pdf]

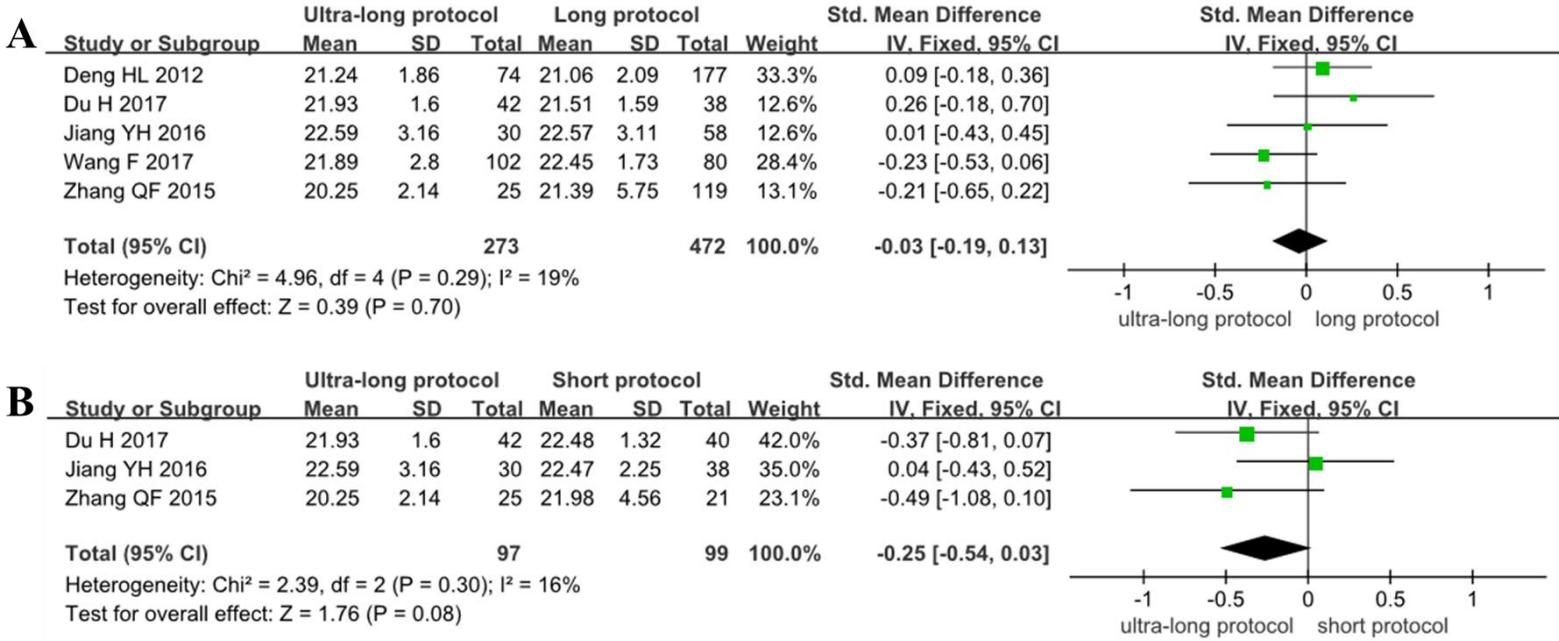

**Fig. S2** Meta-analysis on BMI in non-RCTs: the ultra-long protocol versus long protocol (A), and the ultra-long protocol versus short protocol (B).
