# Supplementary material for: The effectiveness of different down-regulating protocols on in vitro fertilization-embryo transfer in endometriosis: a meta-analysis
Source: Reprod Biol Endocrinol. 2020 Feb 29;18:16. doi: 10.1186/s12958-020-00571-6 (PMC7049222; doi:10.1186/s12958-020-00571-6)
Supplement: Supplementary file 8 — Additional file 8: Figure S4. Meta-analysis on basal E2 levels: the ultra-long protocol versus long protocol in RCTs (A) and in non-RCTs (B), and the ultra-long protocol versus short protocol in non-RCTs (C). [file 12958_2020_571_MOESM8_ESM.pdf]

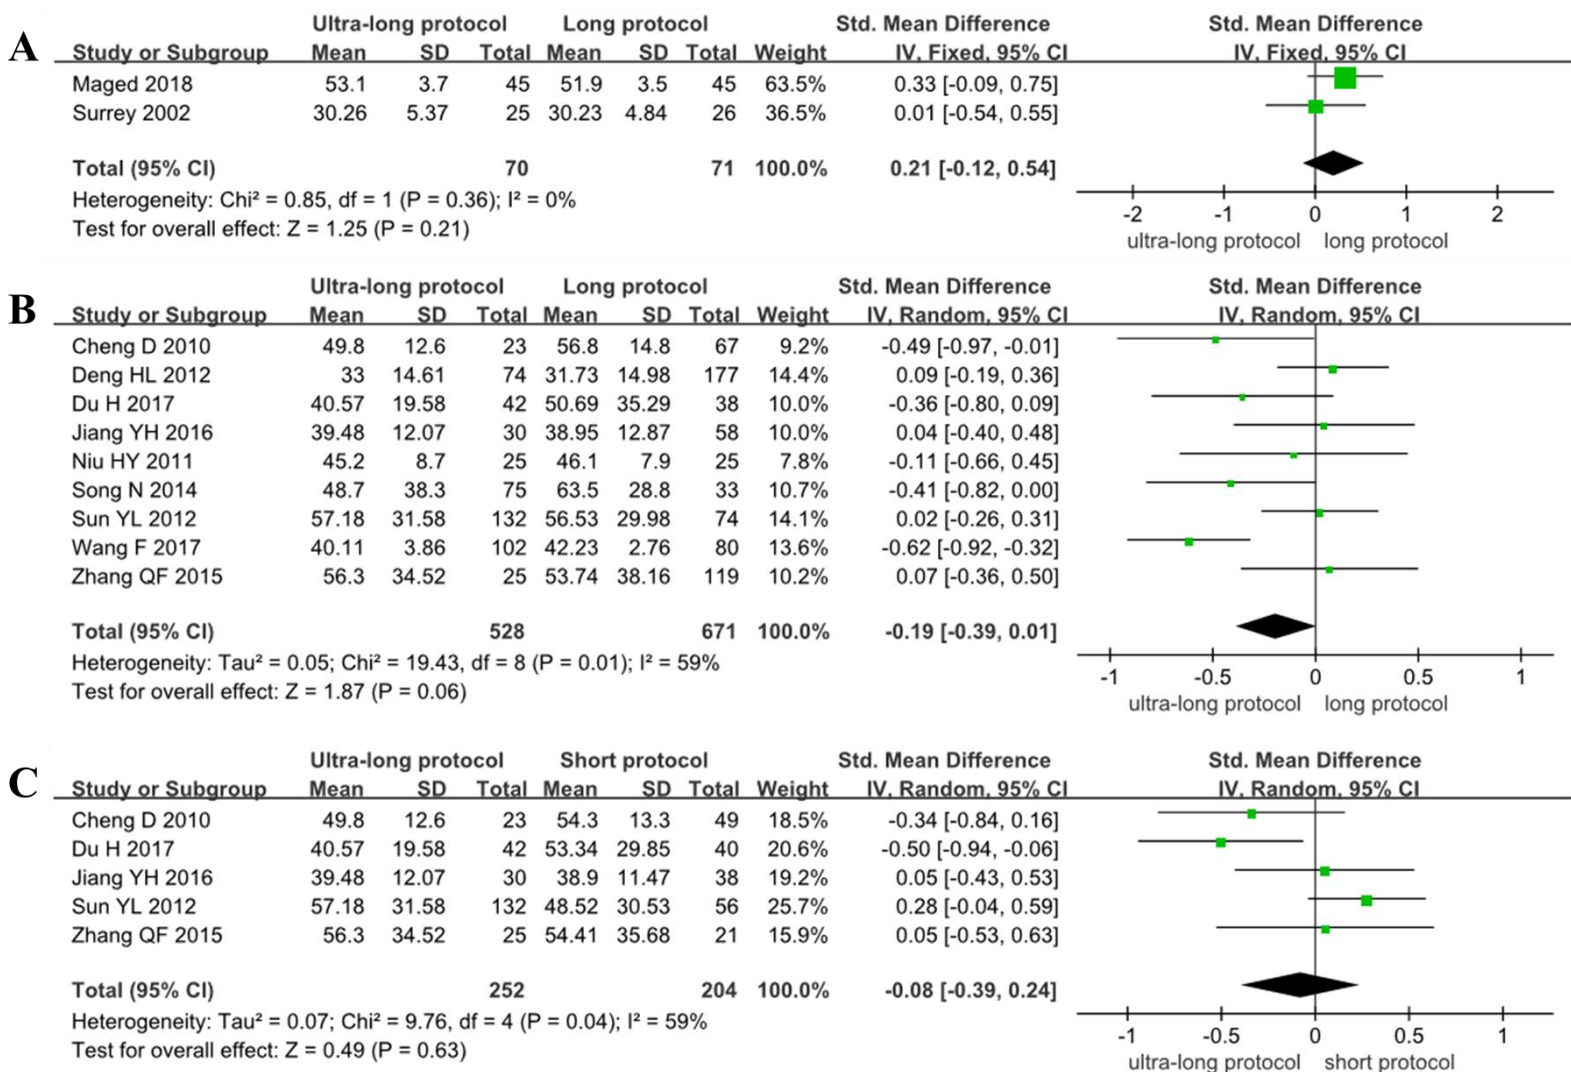

**Fig. S4** Meta-analysis on basal E2 levels: the ultra-long protocol versus long protocol in RCTs (A) and in non-RCTs (B); the ultra-long protocol versus short protocol in non-RCTs (C).
